# Supplementary material for: Benfotiamine protects MPTP-induced Parkinson’s disease mouse model via activating Nrf2 signaling pathway
Source: PubMed Central journal article supplement (PMC11265681; doi:10.1371/journal.pone.0307012), 2024-07-23

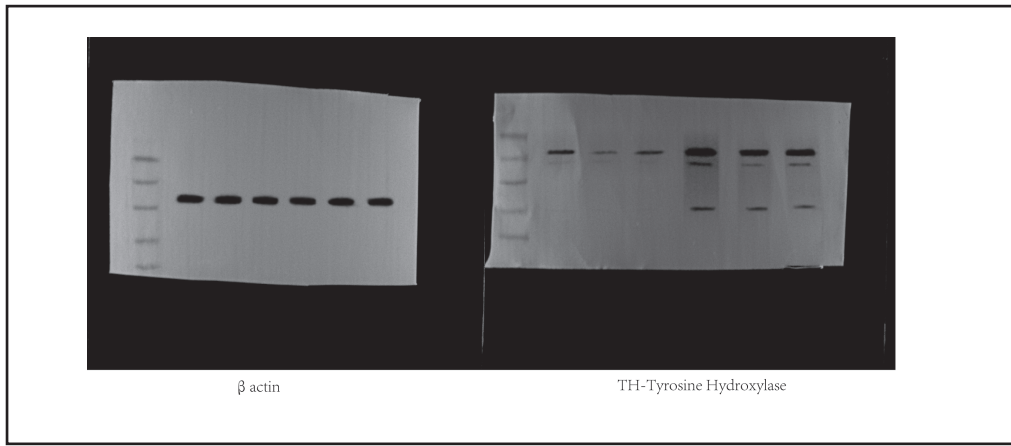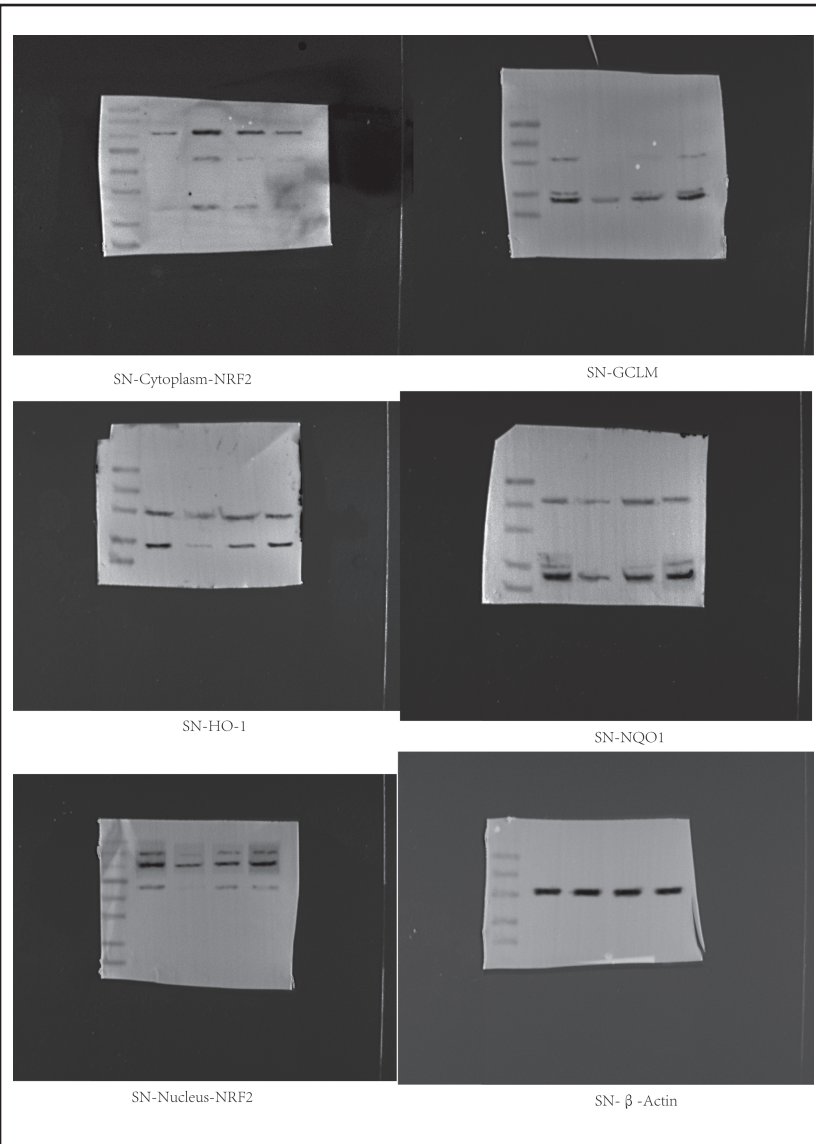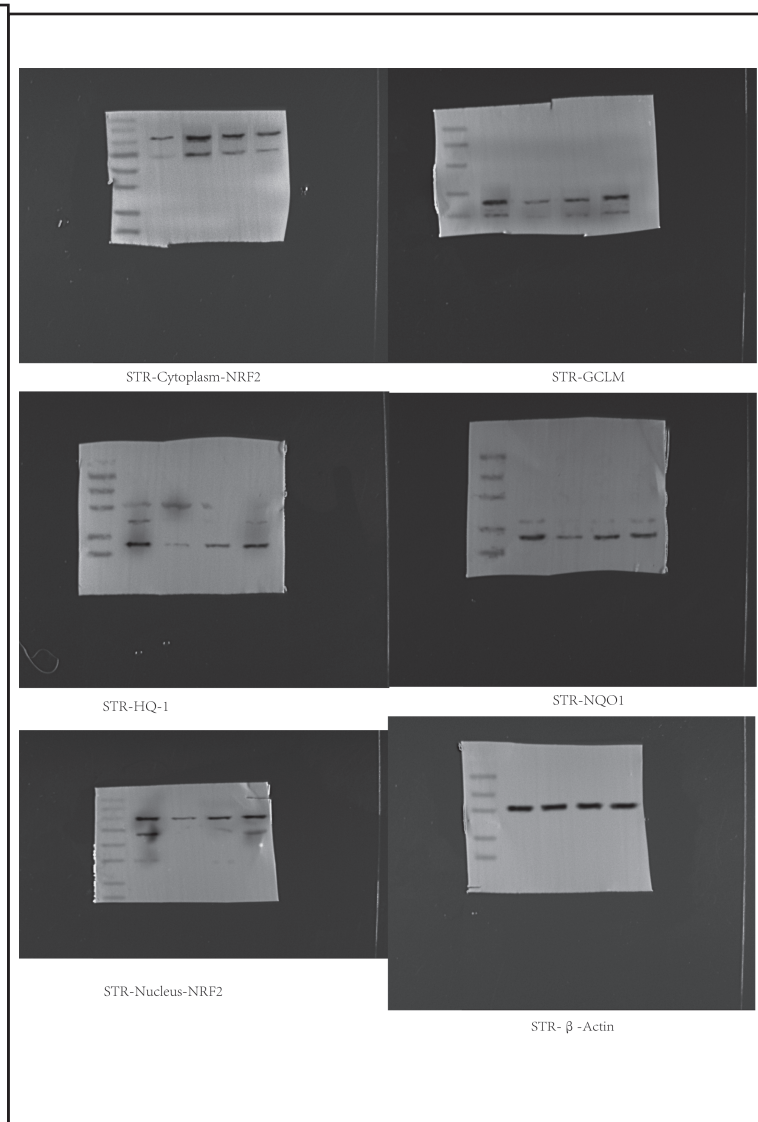

Supplement: pone.0307012.s005.pdf [file pone.0307012.s005.pdf]
